# Supplementary material for: Comparative analyses of genetic trends and prospects for selection against hip and elbow dysplasia in 15 UK dog breeds
Source: PubMed Central journal article supplement (PMC3599011; doi:10.1186/1471-2156-14-16), 2013-03-02
Supplement: 1471-2156-14-16-S1.pdf [file 1471-2156-14-16-S1.pdf]

Additional Table 1. Summary statistics of hip scores of all 15 breeds

| BREED | ndata | mean  | mode | median | SD    | skew |
|-------|-------|-------|------|--------|-------|------|
| AKT   | 1750  | 9.74  | 6    | 8      | 8.64  | 3.82 |
| BEARD | 2187  | 10.63 | 10   | 10     | 6.40  | 4.31 |
| BORD  | 4941  | 12.79 | 10   | 11     | 8.27  | 3.55 |
| ENG   | 2133  | 17.04 | 10   | 13     | 12.64 | 2.39 |
| FCR   | 4377  | 8.54  | 8    | 8      | 5.43  | 4.59 |
| GDN   | 1594  | 20.16 | 10   | 14     | 16.04 | 1.77 |
| NEWF  | 3317  | 23.35 | 9    | 14     | 20.49 | 1.46 |
| RR    | 1901  | 9.85  | 6    | 8      | 8.83  | 4.11 |
| SHUSK | 2721  | 7.89  | 8    | 8      | 4.38  | 1.82 |
| TT    | 2003  | 12.51 | 10   | 10     | 9.77  | 4.08 |
| BMD   | 3372  | 14.57 | 8    | 10     | 12.65 | 2.82 |
| GR    | 22205 | 16.91 | 10   | 12     | 13.10 | 2.40 |
| GSD   | 23765 | 17.58 | 10   | 12     | 15.64 | 2.46 |
| LAB   | 38453 | 12.39 | 8    | 9      | 11.35 | 3.59 |
| ROTT  | 7001  | 11.04 | 6    | 8      | 9.28  | 3.61 |

Number of records (ndata), mean, mode, median, standard deviation (SD) and coefficient of skewness (skew) of hip scores are shown for all 15 breeds. The top panel are the 10 breeds for which only hip score was analysed, while the bottom panel are the 5 breeds for which both hip and elbow score were analysed. Breed abbreviations: Akita [AKT], Bearded Collie [BEARD], Bernese Mountain Dog [BMD], Border Collie [BORD], English Setter [ENG], Flat Coat Retriever [FCR], Gordon Setter [GDN], Golden Retriever [GR], German Shepherd Dog [GSD], Labrador Retriever [LAB], Newfoundland [NEWF], Rottweiler [ROTT], Rhodesian Ridgeback [RR], Siberian Husky [SHUSK] and Tibetan Terrier [TT].
