# Supplementary material for: Comparative analyses of genetic trends and prospects for selection against hip and elbow dysplasia in 15 UK dog breeds
Source: PubMed Central journal article supplement (PMC3599011; doi:10.1186/1471-2156-14-16), 2013-03-02
Supplement: 1471-2156-14-16-S2.pdf [file 1471-2156-14-16-S2.pdf]

## APPENDIX 1

### *Derivation of accuracy of breeding values including F*

The accuracy of evaluation ( $r$ ) for a breeding value is the correlation between the true value ( $TBV$ ) and its estimator ( $EBV$ ). A property of an  $EBV$  calculated by the process of BLUP for a normally distributed random variable is that it is a best linear unbiased estimate. Therefore:

$$TBV = EBV + \epsilon$$

The value of 1 for the slope of the regression of  $TBV$  on  $EBV$  is an expression of the unbiased property. The error term  $\epsilon$  is the prediction error, which has no covariance with the  $EBV$ , otherwise the linear prediction of  $TBV$  by  $EBV$  could be improved, contradicting  $EBV$  itself being the best predictor. The  $var(\epsilon)$  is the prediction error variance or  $PEV$ . Therefore it follows  $var(TBV) = var(EBV) + PEV$ , and  $cov(TBV, EBV) = var(EBV)$ . So following the standard expression for the correlation  $r = \sqrt{(var(EBV)/Var(TBV))}$  and  $r = \sqrt{(1 - PEV/var(TBV))}$  (for example, see Bijma (2012)). The  $PEV$  is obtained directly from the ASREML analysis used here, whereas  $var(TBV)$  is obtained from the leading diagonal of Wright's Numerator Relationship Matrix ( $\mathbf{A}$ ) that is used within the BLUP evaluation. For an animal  $i$  the leading diagonal of  $\mathbf{A}$  is given by  $1+F_i$  where  $F_i$  is the inbreeding coefficient of animal  $i$  with respect to the same base as is used to calculate  $\mathbf{A}$  and  $var(TBV) = (1 + F_i)V_A$  where  $V_A$  is the additive genetic variance in the base generation which is directly estimated by REML methods. Therefore:

$$r = \sqrt{(1 - PEV_i/[(1 + F_i)V_A])}$$

This is used as an approximation when the assumption of normality fails, as typically the  $TBV$  is unknown, and empirical estimates are then impossible.
