# Supplementary material for: Comparative analyses of genetic trends and prospects for selection against hip and elbow dysplasia in 15 UK dog breeds
Source: PubMed Central journal article supplement (PMC3599011; doi:10.1186/1471-2156-14-16), 2013-03-02
Supplement: 1471-2156-14-16-S4.pdf [file 1471-2156-14-16-S4.pdf]

Additional Table 2. Summary statistics of elbow scores for 5 breeds

|      | ndata | mean | mode | median | SD   | skew |
|------|-------|------|------|--------|------|------|
| BMD  | 1733  | 0.57 | 0    | 0      | 0.87 | 1.41 |
| GR   | 2184  | 0.22 | 0    | 0      | 0.52 | 2.70 |
| GSD  | 1675  | 0.19 | 0    | 0      | 0.51 | 3.19 |
| LAB  | 7456  | 0.15 | 0    | 0      | 0.46 | 3.59 |
| ROTT | 566   | 0.61 | 0    | 0.5    | 0.74 | 0.92 |

Number of records (ndata), mean, mode, median, standard deviation (SD) and coefficient of skewness (skew) of elbow scores are shown for the 5 relevant breeds. Breed abbreviations: Bernese Mountain Dog [BMD], Golden Retriever [GR], German Shepherd Dog [GSD], Labrador Retriever [LAB], Rottweiler [ROTT].
