# Supplementary material for: Comparative analyses of genetic trends and prospects for selection against hip and elbow dysplasia in 15 UK dog breeds
Source: PubMed Central journal article supplement (PMC3599011; doi:10.1186/1471-2156-14-16), 2013-03-02
Supplement: 1471-2156-14-16-S5.pdf [file 1471-2156-14-16-S5.pdf]

1 Additional Figure 1. Plot of EBV accuracy on proportion of sires with phenotypes

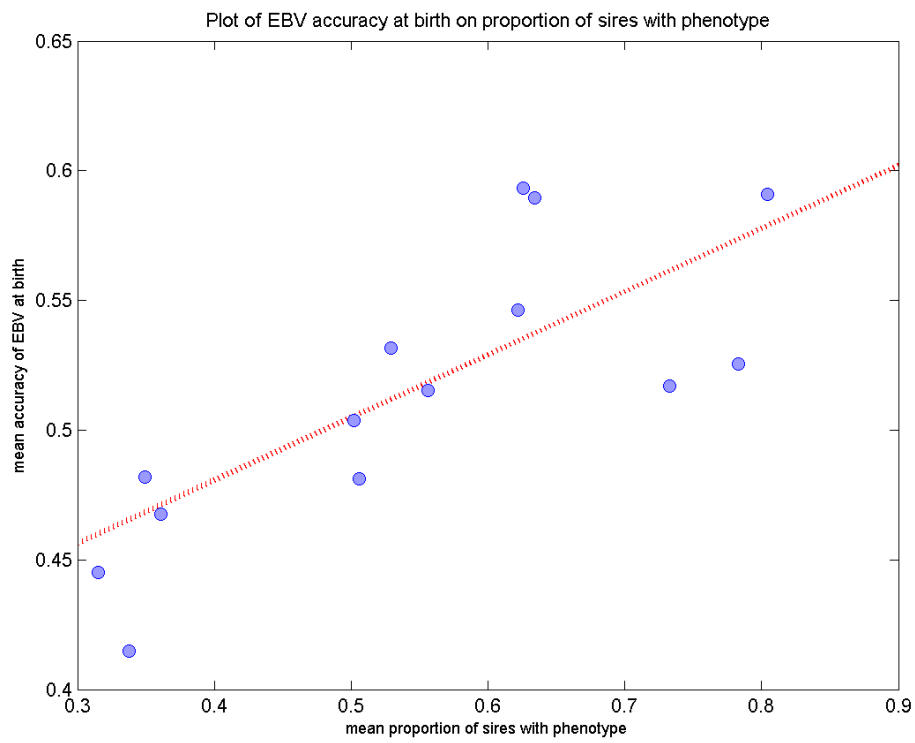

2

3 Plot of mean hip score EBV accuracy of all 2011 born dogs (without phenotype) on the mean  
4 annual proportion of sires with a phenotype. Regression coefficient = 0.24 (s.e. 0.058), 95%  
5 CI 0.13 - 0.36.

6
