# Supplementary material for: Comparative analyses of genetic trends and prospects for selection against hip and elbow dysplasia in 15 UK dog breeds
Source: PubMed Central journal article supplement (PMC3599011; doi:10.1186/1471-2156-14-16), 2013-03-02
Supplement: 1471-2156-14-16-S6.pdf [file 1471-2156-14-16-S6.pdf]

Additional Table 3. Summary of meta-analysis.

| Parameter             | Wt mean | Wt s.e. | v      | mu    | s.e.   |
|-----------------------|---------|---------|--------|-------|--------|
| $h^2_{\text{hips}}$   | 0.367   | 0.0068  | 0.0018 | 0.382 | 0.0143 |
| $h^2_{\text{elbows}}$ | 0.212   | 0.0206  | 0.0008 | 0.218 | 0.0259 |
| $r_A$                 | 0.246   | 0.0464  | 0.0131 | 0.216 | 0.0756 |
| $r_E$                 | 0.017   | 0.0182  | 0.0036 | 0.024 | 0.0352 |

The table shows, for parameters heritability ( $h^2$ ) of and genetic and environmental correlation ( $r_A$  and  $r_E$ ) between hip and elbow score: 1) The weighted mean and standard error of parameter estimate (calculated using the reciprocals of the variance of estimates of all breeds in the sample). 2) The estimate of across breed variance (v). 3) The best estimate of the mean (mu) and s.e. of the parameter for the population of breeds from pooled meta analysis. If  $v = 0$  then mu is identical to Wt mean.
